# Supplementary material for: Ndrg1 promotes adipocyte differentiation and sustains their function
Source: PubMed Central journal article supplement (PMC5543145; doi:10.1038/s41598-017-07497-x), 2017-08-03
Supplement: 41598_2017_7497_MOESM1_ESM.pdf [file 41598_2017_7497_MOESM1_ESM.pdf]

**Supplementary information:**

**Ndrp1 promotes adipocytes differentiation and sustains their function**

Kai Cai, Rabih El-Merahbi, Mona Loeffler, Alexander E. Mayer and Grzegorz Sumara

Rudolf Virchow Center for Experimental Biomedicine, University of Würzburg, Josef-Schneider-Str. 2, Haus D15, D-97080 Würzburg, Germany

## Supplementary Table 1

### QPCR primers:

| Gene Name                                            | Gene Symbol    | Forward sequence                 | Reverse Sequence                  |
|------------------------------------------------------|----------------|----------------------------------|-----------------------------------|
| Peroxisome proliferator-activated receptor- $\gamma$ | Ppar $\gamma$  | GGAAGACCACTC<br>GCATTCCTT        | GTAATCAGCAACC<br>ATTGGGTCA        |
| Fatty acid synthase                                  | Fasn           | GGAGGTGGTGAT<br>AGCCGGTAT        | TGGGTAATCCATA<br>GAGCCCAAG        |
| Hormone-sensitive lipase                             | Hsl            | TTCTCCAAAGCAC<br>CTAGCCAA        | TGTGGAAACTAA<br>GGGCTTGTTG        |
| Adipose triglyceride lipase                          | Atgl           | CAACGCCACTCA<br>CATCTACGG        | GGACACCTCAATA<br>ATGTTGGCAC       |
| Glycerol kinase                                      | Glyk           | CGGAGACCAGCC<br>GTGTAAAG         | GTCCACTGCTCCCA<br>CCAATG          |
| acetyl-Coenzyme A carboxylase alpha                  | Acc1           | GA CAG ACT GAT<br>CGC AGA GAA AG | TGG AGA GCC CCA<br>CAC ACA        |
| stearoyl-Coenzyme A desaturase 1                     | Scd1           | CCC AGT CGT<br>ACA CGT CAT TTT   | CAT CAT TCT CAT<br>GGT CCT GCT    |
| diacylglycerol O-acyltransferase                     | Dgat1          | GTG CCA TCG TCT<br>GCA AGA TT    | CTG GAT AGG ATC<br>CAC CAG GA     |
| Adiponectin                                          | Adiponectin    | CCAACCTGCACA<br>AGTTCCCTT        | TGTTCTCTTAATC<br>CTGCCCA          |
| N-Myc downstream regulated gene 1                    | Ndrg1          | ATGTCCCGAGAG<br>CTACATGAC        | CCTGCTCCTGAACA<br>TCGAACT         |
| Monoglyceride lipase                                 | Mgl            | ACCATGCTGTGAT<br>GCTCTCTG        | CAAACGCCTCGGG<br>GATAACC          |
| CCAAT/enhancer binding protein (C/EBP) alpha         | C/Ebp $\alpha$ | AAACAACGCAAC<br>GTGGAGA          | GCGGTCATTGTCAC<br>TGGTC           |
| Leptin                                               | Leptin         | GTGGCTTTGGTCC<br>TATCTGTC        | CGTGTGTGAAATGT<br>CATTGATCC       |
| Perilipin 1                                          | Perilipin 1    | GGG ACC TGT<br>GAG TGC TTC C     | GTA TTG AAG AGC<br>CGG GAT CTT TT |

### shRNA sequences:

|            |                                                                                                                                                |
|------------|------------------------------------------------------------------------------------------------------------------------------------------------|
| Ndrg1 seq1 | TGCTGTTGACAGTGAGCGTGCTGTTGACAGTGAGCGACAGGATCTTG<br>GAGTTGCTAGATAGTGAAGCCACAGATGTATCTAGCAACTCCAAGAT<br>CCTGGTGCCTACTGCCTCGGACTTCAAGGGGCTAGAATTC |
| Ndrg1 seq2 | TGCTGTTGACAGTGAGCGTGCTGTTGACAGTGAGCGCTCGCTGGTTCT<br>TCAGAGAGAATAGTGAAGCCACAGATGTATTCTCTCTGAAGAACCAG<br>CGATTGCCTACTGCCTCGGACTTCAAGGGGCTAGAATTC |
| Ndrg1 seq3 | TGCTGTTGACAGTGAGCGTGCTGTTGACAGTGAGCGCCGGCAAGGAG<br>GAGATACACAATAGTGAAGCCACAGATGTATTGTGTATCTCCTCCTTG<br>CCGATGCCTACTGCCTCGGACTTCAAGGGGCTAGAATTC |
| Ndrg1      | TGCTGTTGACAGTGAGCGTGCTGTTGACAGTGAGCGCTCCGTGCTTGC                                                                                               |

|               |                                                                                                                                                |
|---------------|------------------------------------------------------------------------------------------------------------------------------------------------|
| seq4          | TTGCTCATTATAGTGAAGCCACAGATGTATAATGAGCAAGCAAGCAC<br>GGAATGCCTACTGCCTCGGACTTCAAGGGGCTAGAATTC                                                     |
| Ndrg1<br>seq5 | TGCTGTTGACAGTGAGCGTGCTGTTGACAGTGAGCGCAGGGATCAGTT<br>TACCTGCCAATAGTGAAGCCACAGATGTATTGGCAGGTAAACTGATCC<br>CTTTGCCTACTGCCTCGGACTTCAAGGGGCTAGAATTC |

**Supplementary Fig. 1 NdrG1 promotes Ppar $\gamma$  abundance.**

Western blot for indicated proteins in control and NdrG1-depleted differentiated 3T3L1 cells stimulated with indicated substances.
